# Supplementary material for: Hyperspectral imaging and chemometrics reveal wood acetylation on different spatial scales
Source: Springer Nature journal article supplement (doi:10.1007/s10853-020-05597-0), 2020-12-10
Supplement: MOESM1 [file 18674314]

# **Hyperspectral imaging and chemometrics reveal wood acetylation on different spatial scales**

Mikko Mäkelä<sup>1,2\*</sup>, Michael Altgen<sup>3</sup>, Tiina Belt<sup>3,4</sup>, Lauri Rautkari<sup>3</sup>

<sup>1</sup>VTT Technical Research Centre of Finland, Ltd., PO Box 1000, 02044 VTT, Finland

<sup>2</sup>Swedish University of Agricultural Sciences, Department of Forest Biomaterials and  
Technology, Skogsmarksgränd, 90183 Umeå, Sweden

<sup>3</sup>Aalto University, School of Chemical Engineering, Department of Bioproducts and  
Biosystems, PO Box 16300, 00076 Aalto, Finland

<sup>4</sup>Natural Resources Institute Finland (Luke), Tietotie 2, FI-02150 Espoo, Finland

E-mails: [mikko.makela@vtt.fi](mailto:mikko.makela@vtt.fi), [mikko.makela@slu.se](mailto:mikko.makela@slu.se) (M. Mäkelä)

## SUPPLEMENTARY MATERIAL

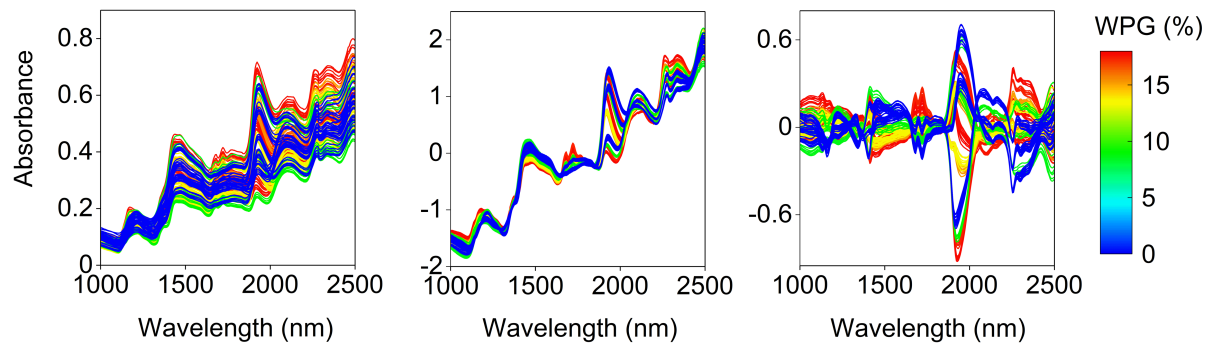

Fig. S.1. Effect of spectral preprocessing and mean centering on average NIR spectra extracted from the calibration samples. From left to right: calibration spectra, SNV transformed calibration spectra, and SNV transformed and mean centered calibration spectra.

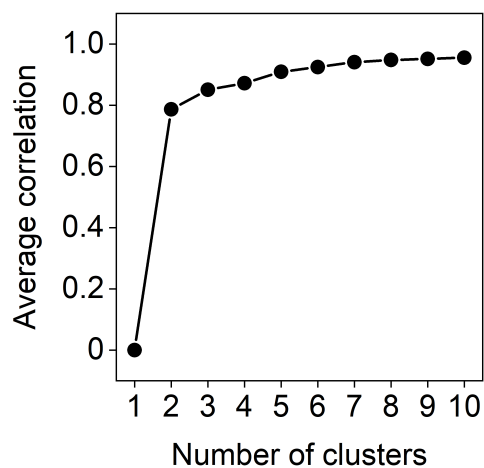

Fig. S.2. Average correlation between pixels and the respective cluster centroids based on the clustering procedure. Five clusters with an average correlation of 0.91 were finally used.

SUPPLEMENTARY MATERIAL

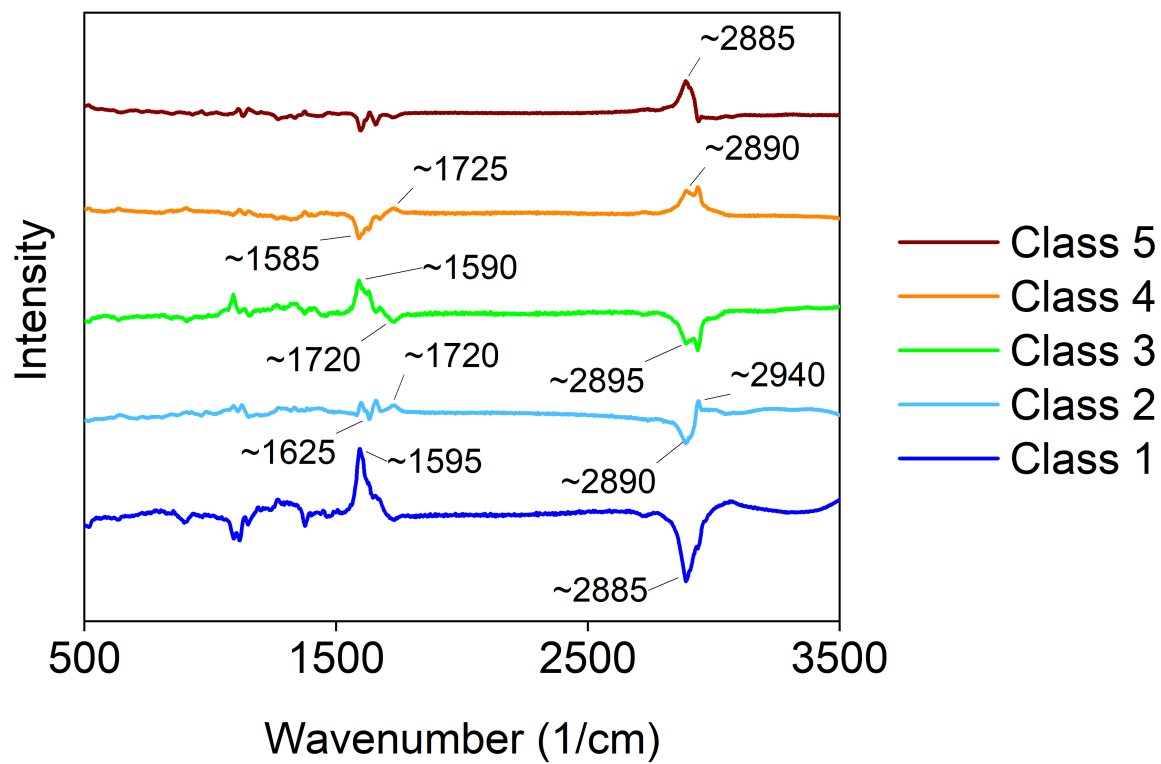

Fig. S.3. Average preprocessed and mean centered spectra of the different classes based on the clustering procedure.
